# Supplementary material for: Mining Functional Gene Modules Linked with Rheumatoid Arthritis Using a SNP-SNP Network
Source: PubMed Central journal article supplement — Genomics Proteomics Bioinformatics. 2012 Mar 23;10(1):23–34. doi: 10.1016/S1672-0229(11)60030-2 (PMC5054489; doi:10.1016/s1672-0229(11)60030-2), 2012-03-23
Supplement: mmc1.pdf [file mmc1.pdf]

## **Supplementary Material**

Hua, L., *et al.* 2012. Mining functional gene modules linked with rheumatoid arthritis using a SNP–SNP network. *Genomics Proteomics Bioinformatics* 10(1): 23-34.

DOI: 10.1016/S1672-0229(11)60030-2.

Tables S1-S3; Figures S1-S3

**Table S1** Number of common SNP-pairs shared by *score*; and *total score* for top 1000 SNP-pairs obtained

|                           | <i>score</i> <sub>1</sub> | <i>score</i> <sub>2</sub> | <i>score</i> <sub>3</sub> | <i>score</i> <sub>4</sub> | <i>score</i> <sub>5</sub> | <i>score</i> <sub>6</sub> | <i>score</i> <sub>7</sub> | <i>total score</i> |
|---------------------------|---------------------------|---------------------------|---------------------------|---------------------------|---------------------------|---------------------------|---------------------------|--------------------|
| <i>score</i> <sub>1</sub> | 1000                      | 321                       | 83                        | 402                       | 64                        | 345                       | 267                       | 318                |
| <i>score</i> <sub>2</sub> | 321                       | 1000                      | 80                        | 915                       | 91                        | 356                       | 293                       | 934                |
| <i>score</i> <sub>3</sub> | 83                        | 80                        | 1000                      | 81                        | 982                       | 90                        | 61                        | 262                |
| <i>score</i> <sub>4</sub> | 402                       | 915                       | 81                        | 1000                      | 63                        | 368                       | 289                       | 879                |
| <i>score</i> <sub>5</sub> | 64                        | 91                        | 982                       | 63                        | 1000                      | 71                        | 65                        | 215                |
| <i>score</i> <sub>6</sub> | 345                       | 356                       | 90                        | 368                       | 71                        | 1000                      | 398                       | 592                |
| <i>score</i> <sub>7</sub> | 267                       | 293                       | 61                        | 289                       | 65                        | 398                       | 1000                      | 206                |
| <i>total score</i>        | 318                       | 934                       | 262                       | 879                       | 215                       | 592                       | 206                       | 1000               |

**Table S2 The top 100 SNP-pairs based on the interaction intensity**

| Rank | SNP-pair            | <i>total score</i> | <i>P</i> | Rank | SNP-pair            | <i>total score</i> | <i>P</i> |
|------|---------------------|--------------------|----------|------|---------------------|--------------------|----------|
| 1    | rs395601*rs2077889  | 3.5094             | 0.00001  | 51   | rs2825276*rs3750203 | 1.7354             | 0.0317   |
| 2    | rs1424903*rs663550  | 3.4649             | 0.00011  | 52   | rs1686430*rs938326  | 1.7282             | 0.0319   |
| 3    | rs744877*rs1033109  | 3.4124             | 0.00022  | 53   | rs1734449*rs938326  | 1.7151             | 0.0323   |
| 4    | rs1424903*rs673834  | 3.3531             | 0.00067  | 54   | rs1969530*rs954986  | 1.6909             | 0.0329   |
| 5    | rs164466*rs1047950  | 3.2849             | 0.00089  | 55   | rs1424903*rs2035415 | 1.6764             | 0.0332   |
| 6    | rs744877*rs1358716  | 3.2699             | 0.0022   | 56   | rs1941487*rs140643  | 1.6624             | 0.0335   |
| 7    | rs955783*rs1860302  | 3.2046             | 0.0026   | 57   | rs1424903*rs1318725 | 1.6439             | 0.0343   |
| 8    | rs1424903*rs1341518 | 3.1820             | 0.0039   | 58   | rs1424903*rs12898   | 1.6347             | 0.0345   |
| 9    | rs2077889*rs1157675 | 3.1067             | 0.0042   | 59   | rs1424903*rs879253  | 1.6007             | 0.0350   |
| 10   | rs1424903*rs1389622 | 3.1016             | 0.0063   | 60   | rs1004531*rs7799    | 1.5908             | 0.0355   |
| 11   | rs1031804*rs2060596 | 2.9785             | 0.0069   | 61   | rs744877*rs737645   | 1.5828             | 0.0358   |
| 12   | rs2077889*rs1424903 | 2.9736             | 0.0106   | 62   | rs1941487*rs1318725 | 1.5801             | 0.0360   |
| 13   | rs1424903*rs1157675 | 2.9534             | 0.0126   | 63   | rs1424903*rs742920  | 1.5729             | 0.0362   |
| 14   | rs2151913*rs1941487 | 2.8054             | 0.0127   | 64   | rs1945645*rs1887984 | 1.5621             | 0.0367   |
| 15   | rs2837710*rs1890007 | 2.7751             | 0.0128   | 65   | rs1864003*rs521861  | 1.5578             | 0.0371   |
| 16   | rs1424903*rs225160  | 2.7699             | 0.0133   | 66   | rs1850407*rs761319  | 1.5474             | 0.0372   |
| 17   | rs10117*rs674630    | 2.7622             | 0.0152   | 67   | rs2077889*rs1050181 | 1.5220             | 0.0377   |
| 18   | rs954986*rs1887984  | 2.7595             | 0.0161   | 68   | rs814397*rs1057613  | 1.5106             | 0.0382   |
| 19   | rs1372887*rs214527  | 2.7569             | 0.0181   | 69   | rs783779*rs1488403  | 1.5091             | 0.0384   |
| 20   | rs700273*rs411103   | 2.7541             | 0.0198   | 70   | rs759382*rs736379   | 1.5009             | 0.0387   |
| 21   | rs1057613*rs705670  | 2.75403            | 0.0209   | 71   | rs1566485*rs744148  | 1.4986             | 0.0388   |
| 22   | rs479062*rs2837710  | 2.75400            | 0.0213   | 72   | rs970595*rs511145   | 1.4861             | 0.0391   |
| 23   | rs2060596*rs1003979 | 2.7516             | 0.0216   | 73   | rs1004531*rs2227551 | 1.4823             | 0.0393   |
| 24   | rs164466*rs1568261  | 2.7515             | 0.0226   | 74   | rs744877*rs37358    | 1.4781             | 0.0395   |
| 25   | rs164466*rs1004531  | 2.5089             | 0.0231   | 75   | rs759939*rs1050181  | 1.4677             | 0.0398   |
| 26   | rs164466*rs736379   | 2.5017             | 0.0232   | 76   | rs1424903*rs1953088 | 1.4652             | 0.0399   |
| 27   | rs10117*rs16946     | 2.4529             | 0.0234   | 77   | rs744877*rs1157308  | 1.4527             | 0.0403   |
| 28   | rs395601*rs910516   | 2.3799             | 0.0239   | 78   | rs673834*rs699778   | 1.4434             | 0.0407   |
| 29   | rs1004531*rs1969530 | 2.2805             | 0.0242   | 79   | rs1953088*rs1450782 | 1.4361             | 0.0413   |
| 30   | rs744877*rs1548506  | 2.2133             | 0.0246   | 80   | rs673834*rs910516   | 1.4252             | 0.0415   |
| 31   | rs759382*rs954986   | 2.1748             | 0.0250   | 81   | rs1430934*rs816943  | 1.4171             | 0.0417   |
| 32   | rs759382*rs983530   | 2.1669             | 0.0253   | 82   | rs1864003*rs247892  | 1.4099             | 0.0419   |
| 33   | rs1568261*rs1953088 | 2.1419             | 0.0255   | 83   | rs1424903*rs342817  | 1.3970             | 0.0423   |
| 34   | rs1004531*rs1409104 | 2.1183             | 0.0256   | 84   | rs2282*rs1395610    | 1.3961             | 0.0424   |
| 35   | rs744877*rs783779   | 2.0883             | 0.0258   | 85   | rs1424903*rs933224  | 1.3882             | 0.0428   |
| 36   | rs2060596*rs1890007 | 2.0746             | 0.0260   | 86   | rs744877*rs1001065  | 1.3865             | 0.0429   |
| 37   | rs1389622*rs2016985 | 2.0370             | 0.0265   | 87   | rs744877*rs968057   | 1.3825             | 0.0430   |
| 38   | rs634742*rs905164   | 2.0082             | 0.0266   | 88   | rs1969530*rs194391  | 1.3761             | 0.0431   |
| 39   | rs1372887*rs3794968 | 1.9955             | 0.0269   | 89   | rs1953088*rs2063099 | 1.3743             | 0.0432   |
| 40   | rs970595*rs17229    | 1.9522             | 0.0272   | 90   | rs164466*rs1920586  | 1.3735             | 0.0433   |
| 41   | rs1850407*rs761319  | 1.9340             | 0.0273   | 91   | rs970595*rs1318725  | 1.3726             | 0.0434   |
| 42   | rs1491233*rs705670  | 1.9323             | 0.0277   | 92   | rs759382*rs663550   | 1.3694             | 0.0435   |
| 43   | rs1572456*rs814397  | 1.9216             | 0.0280   | 93   | rs1568261*rs1057613 | 1.3617             | 0.0436   |
| 44   | rs970595*rs8027424  | 1.8419             | 0.0291   | 94   | rs1424903*rs2051179 | 1.3554             | 0.0438   |
| 45   | rs26956*rs761319    | 1.8329             | 0.0294   | 95   | rs26959*rs955783    | 1.3520             | 0.0440   |
| 46   | rs1850264*rs846319  | 1.8251             | 0.0297   | 96   | rs1424903*rs1391766 | 1.3506             | 0.0441   |
| 47   | rs1566485*rs550238  | 1.7973             | 0.0302   | 97   | rs2535694*rs753012  | 1.3484             | 0.0443   |
| 48   | rs759382*rs1424903  | 1.7776             | 0.0307   | 98   | rs1132975*rs245906  | 1.3422             | 0.0447   |
| 49   | rs2060596*rs1889188 | 1.7559             | 0.0311   | 99   | rs814397*rs1491233  | 1.3402             | 0.0450   |
| 50   | rs2282*rs795734     | 1.7525             | 0.0313   | 100  | rs1858941*rs1889188 | 1.3394             | 0.0452   |

**Table S3 Feature SNPs filtered from the most frequently observed top 100 scoring SNP-pairs with seven scores**

| Feature SNP             | Frequency of SNP observed in each scoring measure and <i>total score</i> |                           |                           |                           |                           |                           |                           | <i>total score</i> |
|-------------------------|--------------------------------------------------------------------------|---------------------------|---------------------------|---------------------------|---------------------------|---------------------------|---------------------------|--------------------|
|                         | <i>score</i> <sub>1</sub>                                                | <i>score</i> <sub>2</sub> | <i>score</i> <sub>3</sub> | <i>score</i> <sub>4</sub> | <i>score</i> <sub>5</sub> | <i>score</i> <sub>6</sub> | <i>score</i> <sub>7</sub> |                    |
| rs164466*               | 1                                                                        | 5                         | 0                         | 6                         | 0                         | 28                        | 34                        | 74                 |
| rs1424903*              | 12                                                                       | 18                        | 0                         | 19                        | 0                         | 13                        | 9                         | 71                 |
| rs744877*               | 9                                                                        | 10                        | 0                         | 8                         | 0                         | 8                         | 5                         | 40                 |
| rs2535694 <sup>a</sup>  | 0                                                                        | 1                         | 10                        | 1                         | 10                        | 0                         | 0                         | 22                 |
| rs395601 <sup>a*</sup>  | 3                                                                        | 2                         | 1                         | 2                         | 1                         | 8                         | 4                         | 21                 |
| rs2060596 <sup>a</sup>  | 3                                                                        | 5                         | 0                         | 4                         | 0                         | 3                         | 4                         | 19                 |
| rs2077889               | 1                                                                        | 4                         | 1                         | 4                         | 1                         | 3                         | 4                         | 18                 |
| rs1969530 <sup>a</sup>  | 2                                                                        | 3                         | 0                         | 4                         | 0                         | 3                         | 6                         | 18                 |
| rs1941487*              | 2                                                                        | 4                         | 0                         | 5                         | 0                         | 4                         | 3                         | 18                 |
| rs1004531 <sup>a*</sup> | 1                                                                        | 5                         | 0                         | 5                         | 0                         | 4                         | 3                         | 18                 |
| rs26959 <sup>a</sup>    | 2                                                                        | 2                         | 0                         | 2                         | 0                         | 3                         | 7                         | 16                 |
| rs759382 <sup>a*</sup>  | 0                                                                        | 3                         | 3                         | 3                         | 3                         | 0                         | 3                         | 15                 |
| rs970595*               | 2                                                                        | 5                         | 0                         | 4                         | 0                         | 2                         | 1                         | 14                 |
| rs1870424 <sup>a</sup>  | 0                                                                        | 0                         | 7                         | 0                         | 7                         | 0                         | 0                         | 14                 |
| rs1318725 <sup>a</sup>  | 0                                                                        | 3                         | 2                         | 4                         | 2                         | 1                         | 1                         | 13                 |

<sup>a</sup>Multiple SNPs in LD, where rs2535694, rs1969530, rs1004531, rs26959, rs759382, rs1870424 and rs1318725 were found in LD with one SNP. rs206596 was found in LD with two SNPs. rs395601 was found in LD with five SNPs.

\*SNPs were confirmed to be associated with RA by previous studies (4, 14).

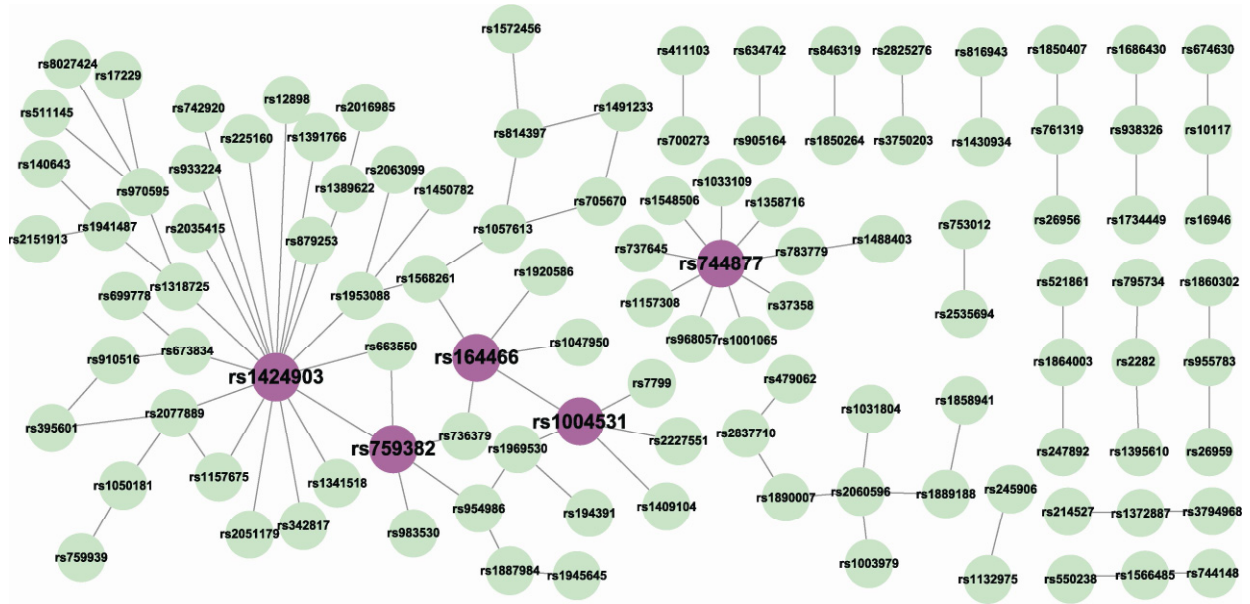

**Figure S1** A SNP-SNP network specific for RA. The network includes 110 SNPs. Each of 100 edges indicates a SNP-pair. The hub SNPs were indicated by pink filled circles.

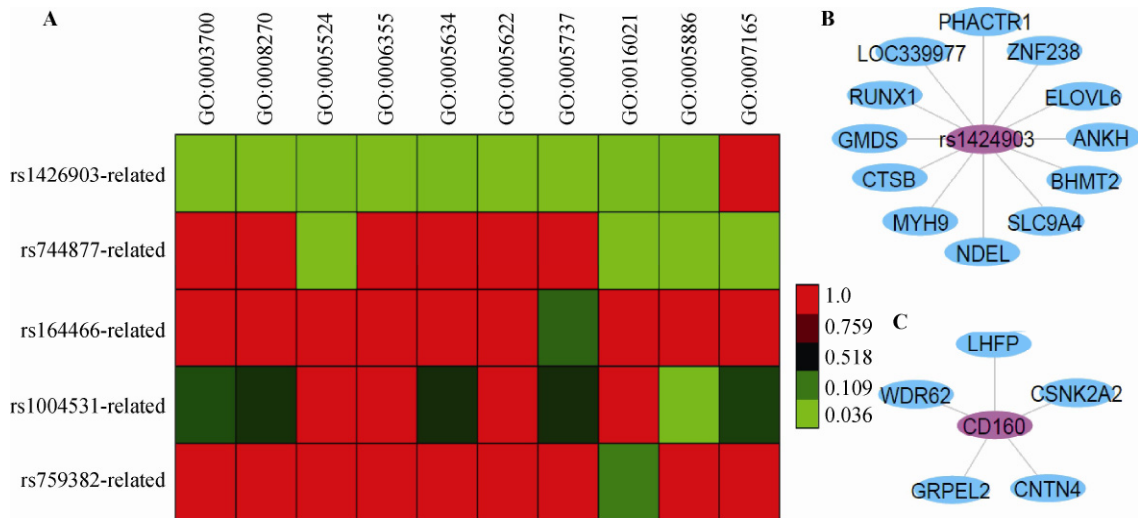

**Figure S2** GO enrichment results for five gene modules. **A.** The enrichment results for five gene modules. The *P*-values are depicted by different colors, where the green colors indicate the greater enrichment effect in GO terms. **B.** Functional gene module with hub SNP rs1424903. **C.** Functional gene module with hub SNP rs744877 (CD160).

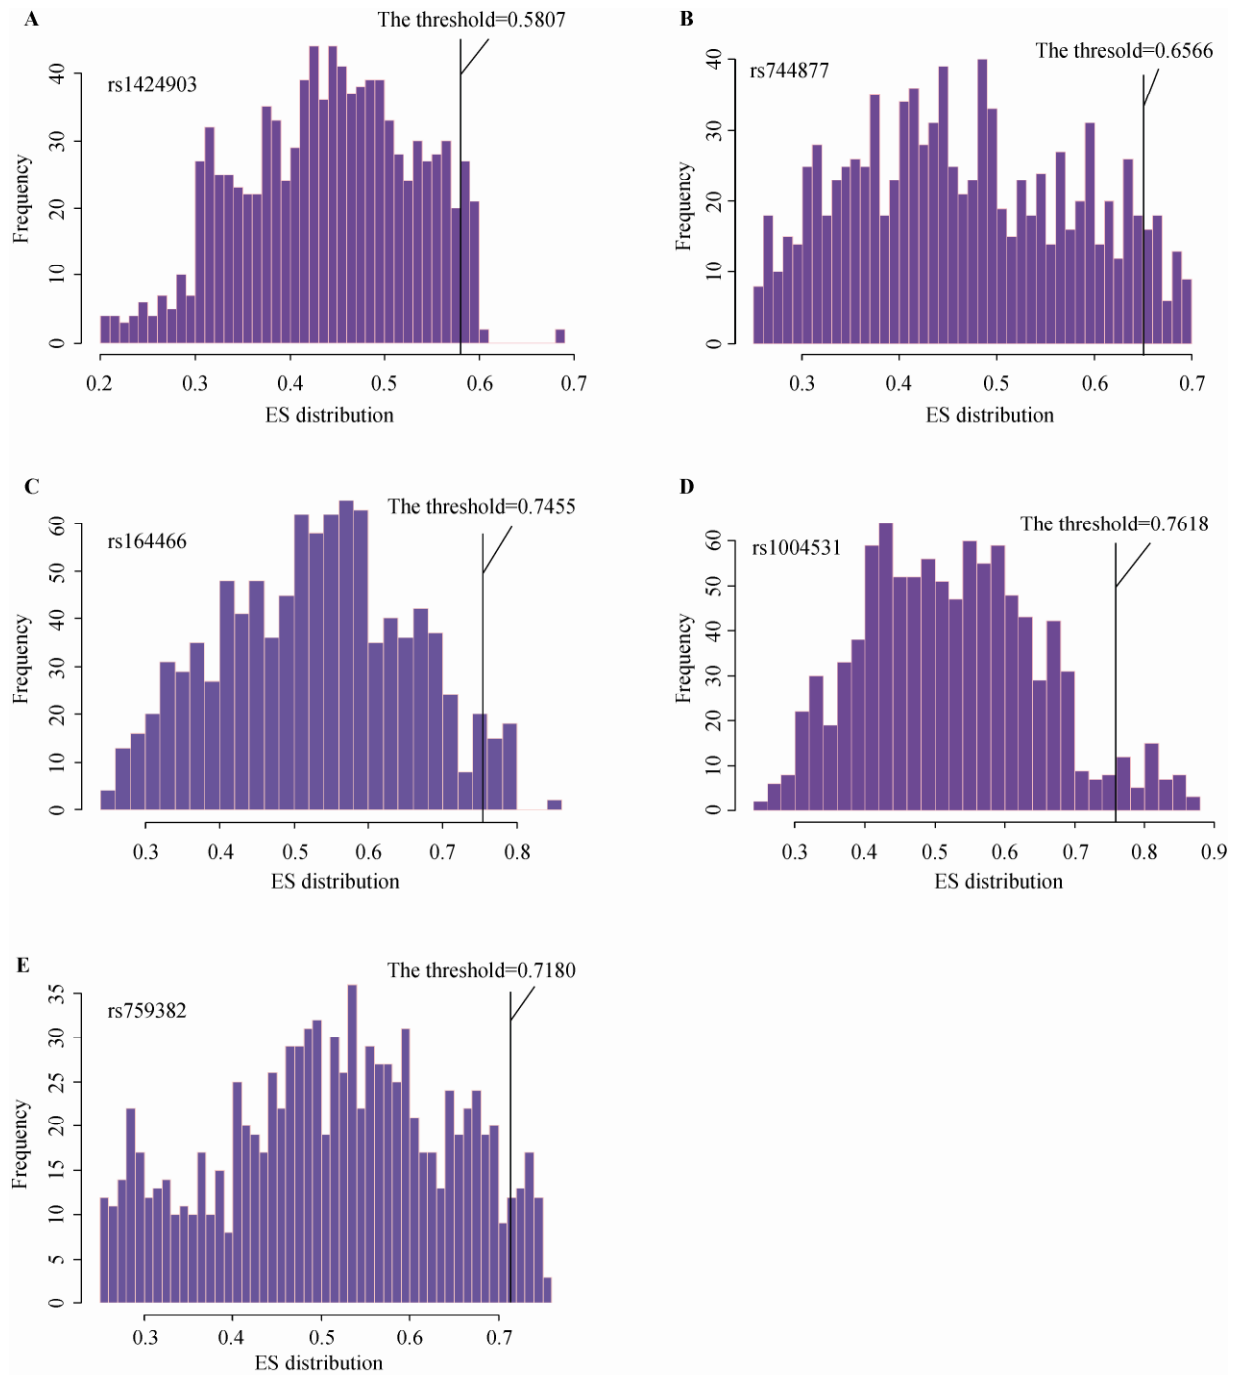

**Figure S3** The background distribution of enrichment score (ES) for five sub-networks. The threshold values of ES for five sub-networks with hub SNP rs1424903 (A), rs744877 (B), rs164466 (C), rs1004531(D) and rs759382 (E) were 0.5807, 0.6566, 0.7455, 0.7618 and 0.7180, respectively as shown in different panels.
